# Supplementary material for: Proteasome inhibition mediates p53 reactivation and anti-cancer activity of 6-Gingerol in cervical cancer cells
Source: PubMed Central journal article supplement (PMC4791234; doi:10.18632/oncotarget.6383), 2015-11-25
Supplement: oncotarget-06-43310-s001.pdf [file oncotarget-06-43310-s001.pdf]

# **Proteasome inhibition mediates p53 reactivation and anti-cancer activity of 6-Gingerol in cervical cancer cells**

## **Supplementary Material**

### **Analysis of Biochemical parameters**

Heparinized blood samples (50µl /mouse) were obtained on day 0 and at the end of the treatment period by sub mandibular bleeding. The clinical chemistry of the blood including parameters for AST: aspartate aminotransferase; ALT: alanine aminotransferase; BUN: blood urea nitrogen; WBC: White blood cells; Hgb: hemoglobin and PLT: Platelets were obtained using the Hemagen Analyst<sup>VR</sup> Benchtop Chemistry System (Hemagen Diagnostics, Inc. Columbia,USA).

### **Mitochondrial complex activity assay**

The activity of MRC complexes was determined with Mitochondrial Respiratory Chain Complex-I Activity Assay Kit (Novagen, Merck, Darmstadt, Germany) as per the manufacturer's instructions.

### **Micro CT Analysis**

Right femoral bones were harvested and analyzed for bone mineral content, cortical thickness, and cortical bone area by microCT (Skyscan 1172, Aartselaar, Belgium). The the length of each femoral bone was measured at mid-diaphysis, and 40 mid-diaphyseal slices were used for the anlysis. The data were collected at 55 kVp and 72 µA at a resolution of 12 µm, and volumetric analysis was performed using Skyscan software.

**Primers used in the study:**

| <b>Gene</b>  | <b>Forward</b>            | <b>Reverse</b>              |
|--------------|---------------------------|-----------------------------|
| <b>E6</b>    | GCAAATGCAGGTGTGGATAATA    | TCTAATGGTGGACAATCACCTG      |
| <b>E7</b>    | CTCTGTGGCCATTGTATCA       | GCGAGTCACATAATCATCGGTA      |
| <b>p21</b>   | ATGAAATTCACCCCCTTTCC      | CCCTAGGCTGTGCTCACTTC        |
| <b>18S</b>   | CTTGGATGTGGTAGCCGTTT      | TAACGAGGATCCATTGGAGG        |
| <b>ALP</b>   | AACCCAGACACAAGCATTCC      | GAGACATTTTCCCGTTCACC        |
| <b>BMP2</b>  | TGAGGATTAGCAGGTCTTTG      | CACAACCATGTCCTGATAA         |
| <b>SMAD7</b> | GCAGGCTGTCCAGATGCTGT      | GATCCCCAGGCTCCAGAAGA        |
| <b>LEF1</b>  | CCCACACGGACAGTGACCTA      | TGGGCTCCTGCTCCTTTCT         |
| <b>PTH1R</b> | CCTAAACTCC- CACTGTCCTT    | CCTCAGGTTCTTGATTCACT        |
| <b>Sost</b>  | TCCTCCTGAGAACAACCAGAC     | TGTCAGGAAGCGGGTGTAGTG       |
| <b>ATF4</b>  | GCA AGG AGG ATG CCT TTT C | GTT TCC AGG TCA TCC ATT CG  |
| <b>AXIN2</b> | AGTGAGACGCTCTCCCTCACCA    | GAAACGGGCATAGGTTTGGTGGAC    |
| <b>FoxO1</b> | CAAAGTACACATACGGCCAATCC   | CGTAACTTGATTTGCTGTCCTGAA    |
| <b>OPG</b>   | TCA AAG GCA GGC GAT ACT   | CAA TGT CTT CCT CCT CAC TGT |
| <b>GAPDH</b> | TGCTGAGTATGTCGTGGAGTCT    | CATATTTCTCGTGGTTCACACC      |

**Supplementary Table 1: Comparison of docking score, binding energy and interacting residues between 6G and standard inhibitors Bortezomib and Lactacystin.**

| S.No | Ligand      | Receptor   | H-Bonds                          | Interacting residues                                                         | Docking Score |
|------|-------------|------------|----------------------------------|------------------------------------------------------------------------------|---------------|
| 1    | Bortezomib  | Proteasome | 4<br>(GLY47, THR1, THR21, ALA49) | GLY47, THR20, ARG45, ARG19, THR1, THR21, THR52, THR22, ALA49, SER168, LYS33  | -7.17         |
| 3    | Lactacystin | Proteasome | 4<br>(THR21, THR1, GLY23, THR21) | GLY23, GLY47, THR22, THR1, THR20, THR21, ALA49, SER48, SER46                 | -5.38         |
| 2    | Gingerol    | Proteasome | 3<br>(THR1, SER129)              | GLY128, ARG19, SER129, THR1, SER48, GLY47, THR20, SER46, THR52, ARG45, THR21 | -4.94         |

**Supplementary Table 2: Pathological characteristics of primary cervical carcinoma cells used in the study**

| <b>Sample No</b> | <b>HPV Type</b> | <b>Histology</b>        | <b>Stage (According to the FIGO System)</b> | <b>Site of Disease</b> |
|------------------|-----------------|-------------------------|---------------------------------------------|------------------------|
| 1                | 16              | Squamous Cell Carcinoma | IIB                                         | Cervix                 |
| 2                | 18              | Adenocarcinoma          | IIB                                         | Cervix                 |
| 3                | 16              | Squamous Cell Carcinoma | IIB                                         | Cervix                 |
| 4                | 16              | Squamous Cell Carcinoma | IIB                                         | Cervix                 |
| 5                | 18              | Adenocarcinoma          | IIB                                         | Cervix                 |
| 6                | 18              | Adenocarcinoma          | IIB                                         | Cervix                 |
| 7                | 18              | Adenocarcinoma          | IIB                                         | Cervix                 |
| 8                | 18              | Adenocarcinoma          | IIB                                         | Cervix                 |
| 9                | 18              | Adenocarcinoma          | IIB                                         | Cervix                 |
| 10               | 18              | Adenocarcinoma          | IIB                                         | Cervix                 |
| 11               | 16              | Squamous Cell Carcinoma | IIB                                         | Cervix                 |
| 12               | 16              | Squamous Cell Carcinoma | IIB                                         | Cervix                 |

**Supplementary Table 3: Biochemical parameters of 6G from blood samples of experimental mice.**

| <b>Groups</b>         | <b>AST<br/>(U/L)</b> | <b>ALT<br/>(U/L)</b> | <b>BUN<br/>(mg/dL)</b> | <b>Hgb<br/>(mg/dL)</b> | <b>WBC<br/>(K/<math>\mu</math>l)</b> | <b>PLT<br/>(K/<math>\mu</math>l)</b> |
|-----------------------|----------------------|----------------------|------------------------|------------------------|--------------------------------------|--------------------------------------|
| Control               | 117 $\pm$ 9.1        | 39 $\pm$ 2.1         | 57 $\pm$ 2.1           | 12.2 $\pm$ 0.3         | 2.9 $\pm$ 0.2                        | 841 $\pm$ 33                         |
| 6G ( 2.5 mg/Kg<br>BW) | 126 $\pm$ 7.4        | 36 $\pm$ 1.9         | 56 $\pm$ 1.9           | 12.2 $\pm$ 0.5         | 2.6 $\pm$ 0.15                       | 835 $\pm$ 22                         |
| 6G ( 5.0 mg/Kg<br>BW) | 118 $\pm$ 6.2        | 39 $\pm$ 2.1         | 54 $\pm$ 3.3           | 11.8 $\pm$ 0.9         | 2.6 $\pm$ 0.12                       | 837 $\pm$ 21                         |

The representative data of three independent experiments is presented as mean  $\pm$  SD.

**Supplementary Table 4: Summary of microCT analysis of femoral bone.**

| <b>Parameters</b>                     | <b>Control</b> | <b>6G (2.5mg/Kg BW)</b> | <b>6G (5mg/Kg BW)</b> | <b>6G (50mg/Kg BW)</b> |
|---------------------------------------|----------------|-------------------------|-----------------------|------------------------|
| <b>Cortical BMC (mg)</b>              | 0.566 ± 0.014  | 0.565 ± 0.018           | 0.567 ± 0.012         | 0.564 ± 0.013          |
| <b>Cortical thickness (mm)</b>        | 0.118 ± 0.004  | 0.117 ± 0.002           | 0.119 ± 0.005         | 0.118 ± 0.003          |
| <b>Cortical area (mm<sup>2</sup>)</b> | 0.952 ± 0.019  | 0.956 ± 0.023           | 0.957 ± 0.026         | 0.954 ± 0.025          |
| <b>Trabecular BMC (mg)</b>            | 0.078 ± 0.012  | 0.081 ± 0.012           | 0.080 ± 0.012         | 0.079 ± 0.011          |
| <b>Trabecular thickness (mm)</b>      | 0.068 ± 0.001  | 0.069 ± 0.008           | 0.065 ± 0.003         | 0.063 ± 0.002          |
| <b>Trabecular number (1/mm)</b>       | 2.149 ± 0.094  | 2.149 ± 0.098           | 2.149 ± 0.102         | 2.147 ± 0.099          |

BMC = bone mineral content. The representative data of three independent experiments is presented as mean ± SD.

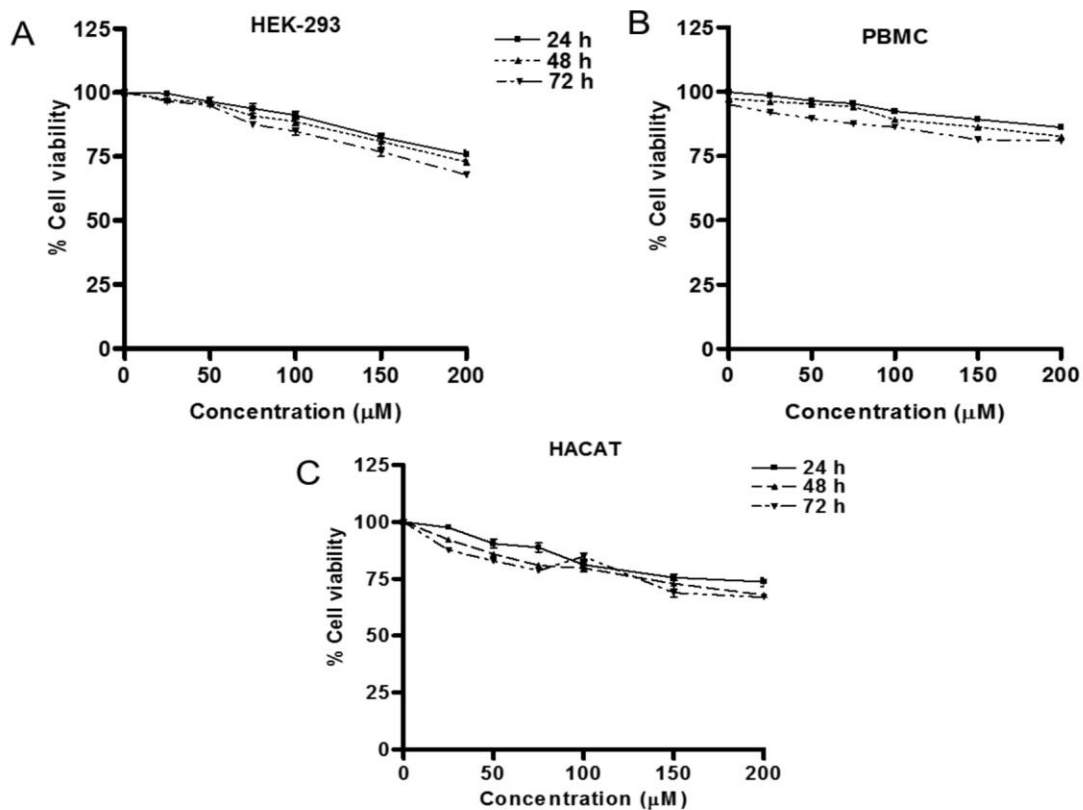

**Figure S1. Safety profile of 6G on non-cancerous normal cell lines.** 6G exhibited safer profiles with non-transformed normal cells. Non-transformed HEK-293 (A), Peripheral derived mononuclear cells (PBMC) (B) and HACAT (C) cells were treated with different concentrations of 6G for 24, 48 and 72h and subjected to MTT assay. The representative data of three independent experiments is presented as mean  $\pm$  SD.

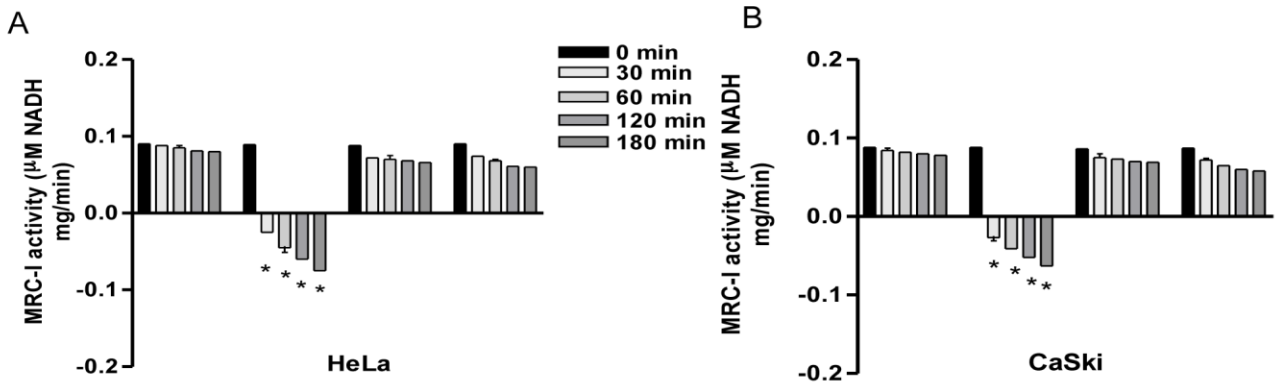

**Figure S2. Effect of 6G on MRC-I.** HeLa (A) and CaSki (B) cells were treated with 6G and MRC-I complex activity was determined for indicated time points. Reduction in MRC-I complex activity was observed in comparison to control \* $p \leq 0.05$ . The representative data of three independent experiments is presented as mean  $\pm$  SD.

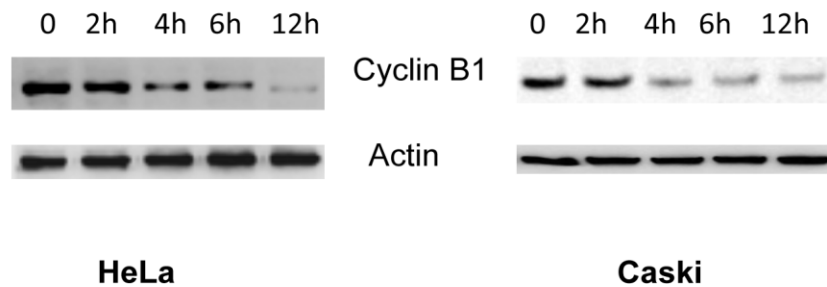

**Supplementary Figure S3. Effect of 6G on Cyclin B1 expression in Cervical cancer cells.** The cervical cancer cell lines (HeLa and CaSki) were treated with 6G for the indicated time periods. The cell lysates were immunoblotted for cyclin B1 expression. The representative data of three independent experiments is presented.



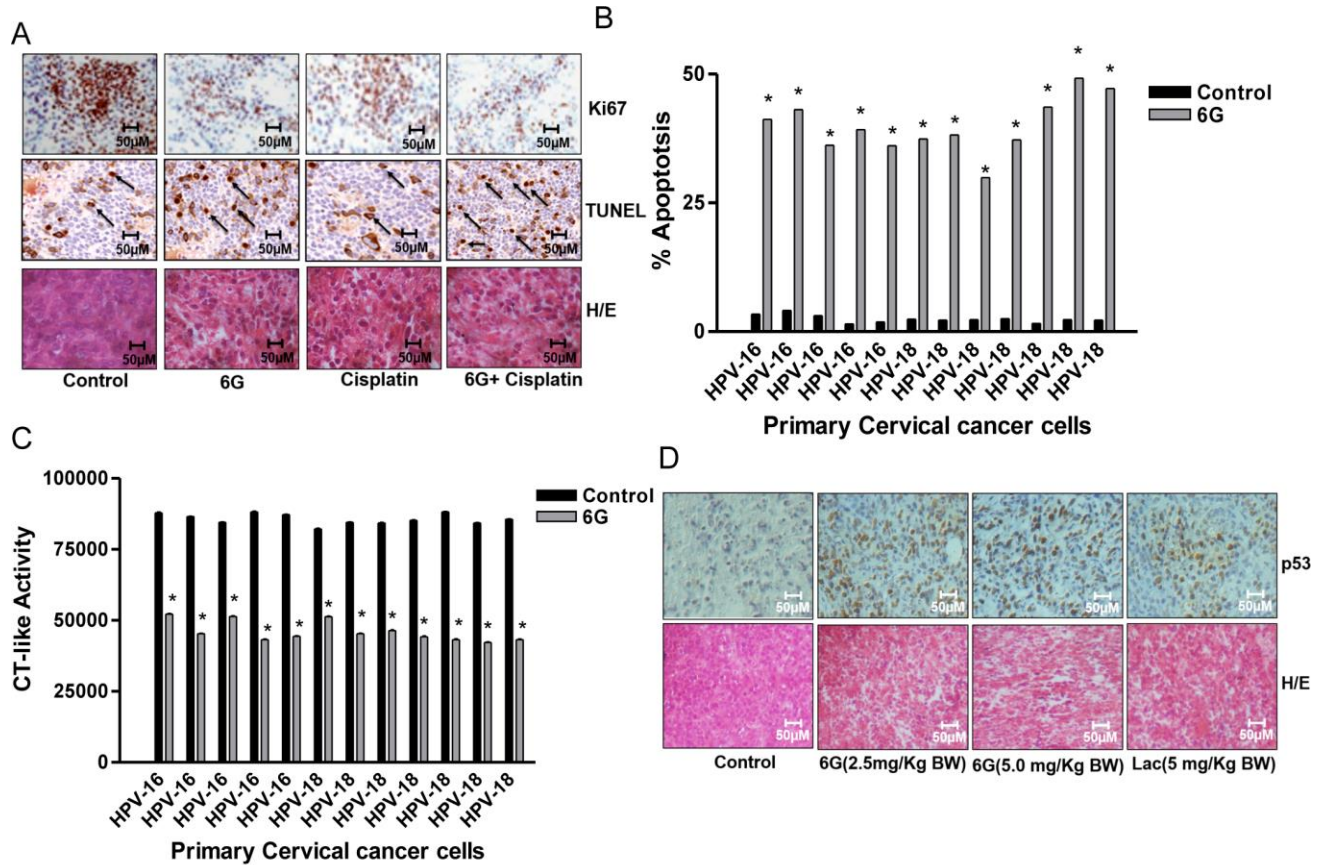

**Figure S4. Effect of 6G induced apoptosis on primary cervical cancer cells and Xenograft model.** (A) Tumor Xenograft sections were stained for Ki67 and TUNEL positive cells in Control, 6G, Cisplatin and 6G + Cisplatin treated groups. Arrows indicate TUNEL positive cells. (B) Cells derived from both HPV 16 and 18 positive cells were isolated, cultured and treated with 6G and percent apoptosis was determined by Annexin-V-FITC/PI staining. Bar graphs are representative of  $\pm$ SD of three independent experiments in comparison to control group  $*p \leq 0.05$ . (C) Cells treated with 6G were subjected to Chymotrypsin (CT)-like activity assay. Relative fluorescence was measured in comparison to control  $*p \leq 0.05$ . The representative data of three independent experiments is presented as mean  $\pm$  SD. (D) Immunohistochemical staining for p53 gene in tumor xenograft tissue sections in indicated groups.

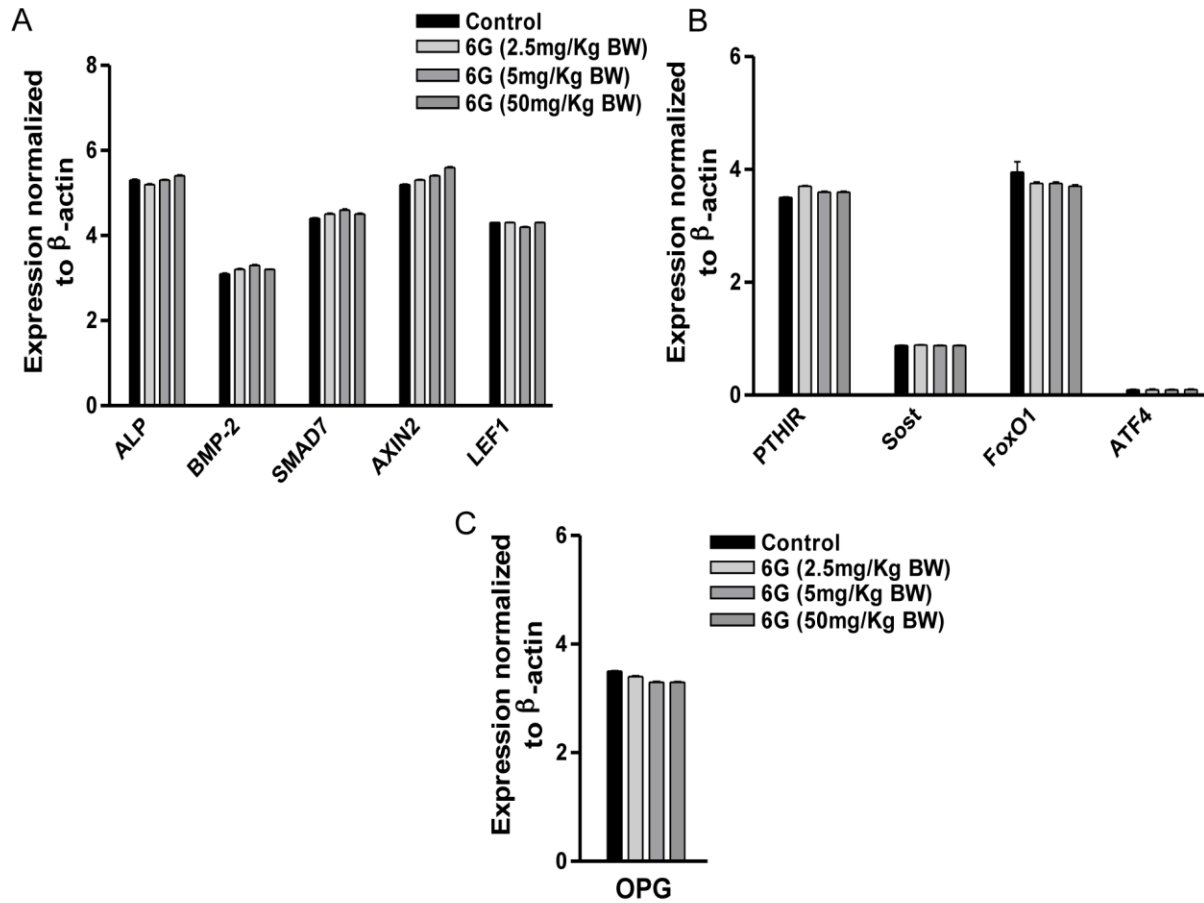

**Figure S5. Effect of 6G on osteogenic parameters.** Mice (N=8 per Group) were treated with control vehicle or or the indicated doses of 6G for 4 weeks. (A) Realtime RT-qPCR analysis of RNA isolated from calvarial bone for osteoblastic differentiation markers, (A) alkaline phosphatase (ALP), (B) BMP-2 and its target gene, Smad7, and Wnt target genes, Axin-2 and LEF-1. (B) Realtime RT-qPCR analysis of RNA isolated from femoral cortical bone, devoid of bone marrow, for (A) PTH1R and Sost, (B) FoxO1, and ATF4 expression. (C) RT-qPCR analysis of RNA isolated from femoral cortical bone for OPG. The representative data of three independent experiments is presented as mean  $\pm$  SD.
